# Supplementary material for: A general method for type I and type II g-C3N4/g-C3N4 metal-free isotype heterostructures with enhanced visible light photocatalysis
Source: Royal Society of Chemistry journal article supplement (doi:10.1039/c5nj00351b), 2015-01-01
Supplement: c5nj00351b1.pdf [file c5nj00351b1.pdf]

**Electronic Supplementary Information** for  
**A General Method for Type I and Type II g-C<sub>3</sub>N<sub>4</sub>/g-C<sub>3</sub>N<sub>4</sub>  
Metal-Free Isotype Heterostructures with Enhanced Visible  
Light Photocatalysis**

Fan Dong <sup>a,\*</sup>, Zilin Ni <sup>a</sup>, Peidong Li <sup>a</sup>, Zhongbiao Wu <sup>b</sup>

<sup>a</sup> Chongqing Key Laboratory of Catalysis and Functional Organic Molecules, College of Environmental and Biological Engineering, Chongqing Technology and Business University, Chongqing, 400067, China.

<sup>b</sup> Department of Environmental Engineering, Zhejiang University, Hangzhou, Zhejiang 310027, China.

\* To whom correspondence should be addressed. Tel/Fax: + 23-62769785-605,  
E-mail: dfctbu@126.com (Fan Dong)

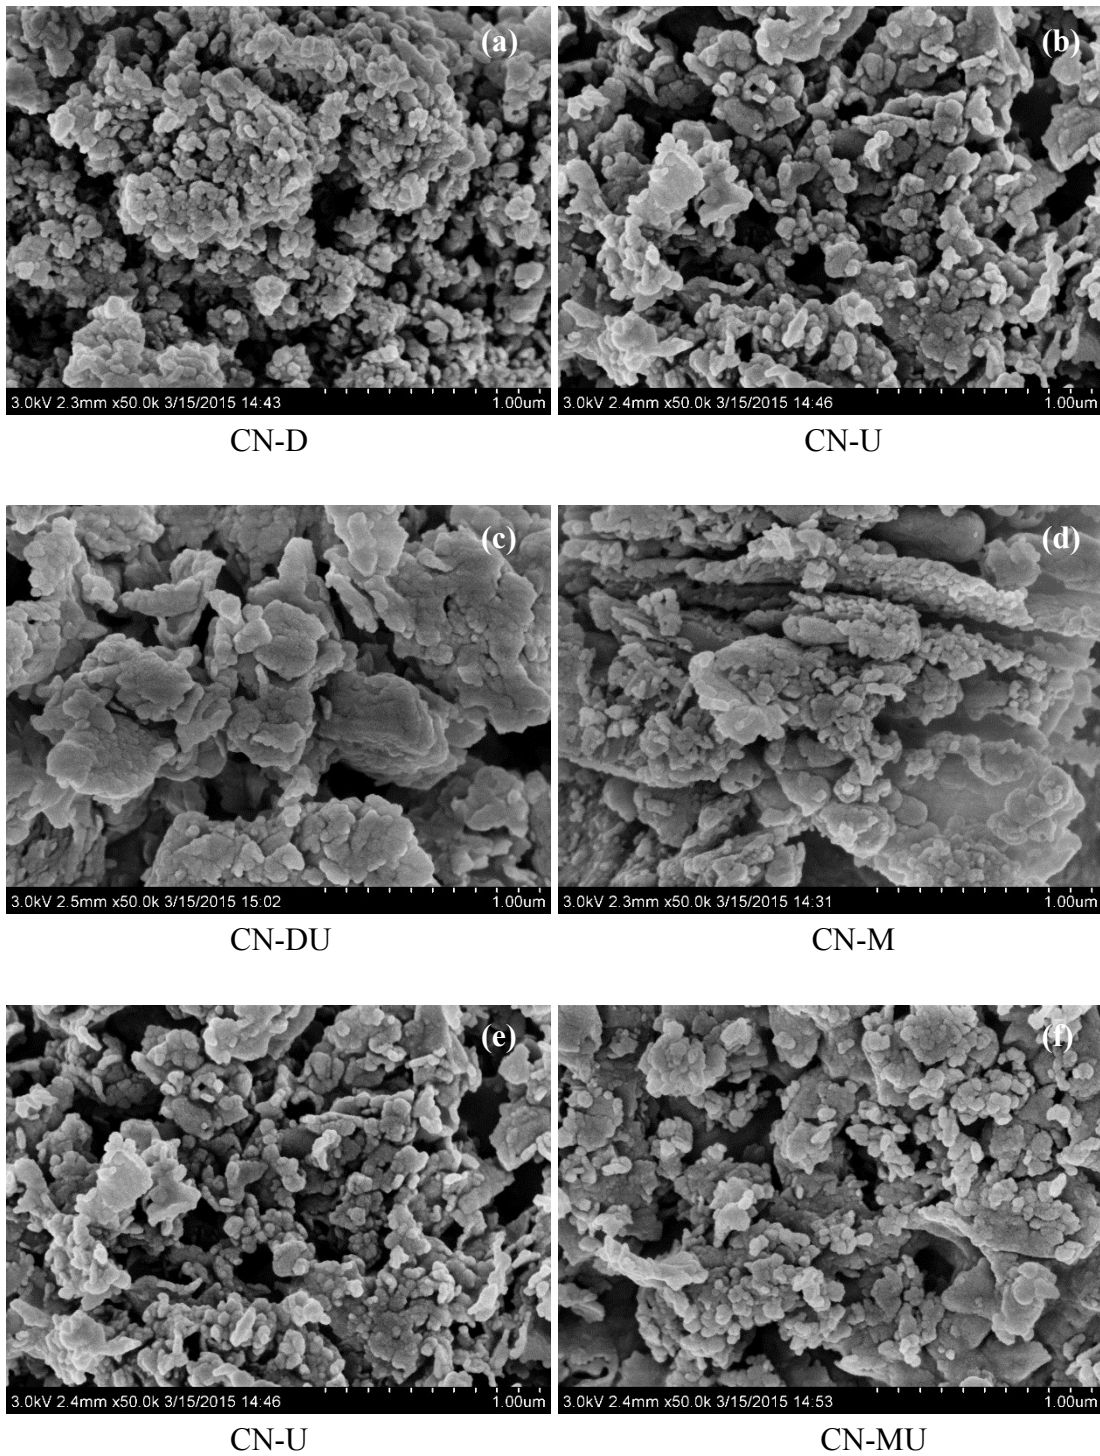

Fig. S1 SEM images of all samples, CN-D (a), CN-U (b), CN-DU (c), CN-M (d), CN-U (e) and CN-MU (f).
